# Supplementary material
Source: MDPI journal article supplement (https://www.mdpi.com/1424-8220/14/4/6891)
Supplement: s1 [file s1]

*Note:*

On page 6909, Ref. 21, line 3, the conference date should be 14–16 July 2010.
